# Supplementary material
Source: Royal Society of Chemistry journal article supplement (doi:10.1039/d6cp00585c)
Supplement: d6cp00585c1.pdf [file d6cp00585c1.pdf]

# Role of hydroxy substitution on the conformation and excited state dynamics of Chalcone

## Supplementary Information

Surajit Kayal<sup>\*,†</sup>, Brijesh Kumar Mishra<sup>†</sup>, Nishant Dhiman<sup>‡</sup>,

<sup>†</sup>*School of Interwoven Arts and Sciences, Krea University, AP-517646, India*

<sup>‡</sup>*Inorganic and Physical Chemistry Department, Indian Institute of Science, Bangalore, India*

E-mail: [surajit.kayal@krea.edu.in](mailto:surajit.kayal@krea.edu.in)

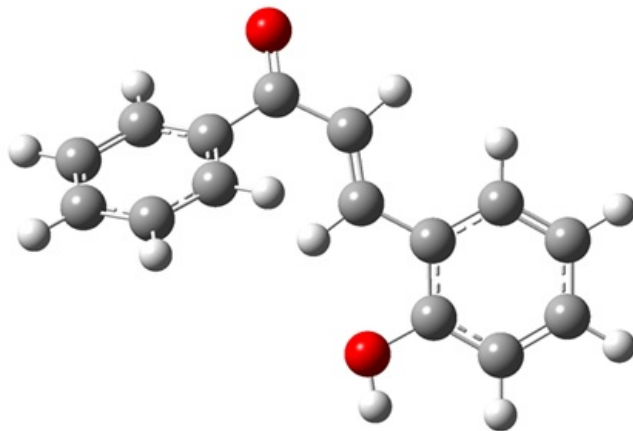

**Figure 1** (a) Optimized structure of *s-trans* 2-hydroxychalcone at CAM-B3LYP/6-311++G\*\* level of theory in acetonitrile with CPCM model. The relative energy with respect to the most stable conformer (C\_1) is 1.2 kcal mol<sup>-1</sup>, with a Boltzmann population of 10%.

**Table 1** Optimized Cartesian coordinates of unsubstituted Chalcone (*s-cis* conformer) at the CAM-B3LYP/6-311++G\*\* level of theory in gas phase (Charge = 0, Multiplicity = 1).

| Atom | x (Å)     | y (Å)     | z (Å)     |
|------|-----------|-----------|-----------|
| C    | -5.201216 | 0.788595  | -0.070438 |
| C    | -4.990573 | -0.559241 | 0.179156  |
| C    | -3.698625 | -1.062471 | 0.217473  |
| C    | -2.595367 | -0.231335 | 0.010525  |
| C    | -2.824843 | 1.125231  | -0.242653 |
| C    | -4.112784 | 1.628688  | -0.282402 |
| C    | -1.256372 | -0.820097 | 0.065801  |
| C    | -0.082845 | -0.192185 | -0.048479 |
| C    | 1.181156  | -0.965021 | 0.012964  |
| O    | 1.176930  | -2.180853 | 0.048163  |
| C    | 2.483023  | -0.222533 | 0.012437  |
| C    | 2.586548  | 1.133641  | 0.317775  |
| C    | 3.825871  | 1.758822  | 0.327287  |
| C    | 4.970234  | 1.037479  | 0.019373  |
| C    | 4.875849  | -0.315577 | -0.286278 |
| C    | 3.641600  | -0.941848 | -0.282149 |
| H    | 3.896916  | 2.810635  | 0.576633  |
| H    | 1.706829  | 1.709506  | 0.573707  |
| H    | 3.547673  | -1.997174 | -0.503876 |
| H    | 5.768415  | -0.881349 | -0.524843 |
| H    | 5.936546  | 1.527814  | 0.020461  |
| H    | -0.028476 | 0.876445  | -0.204672 |
| H    | -1.214274 | -1.895276 | 0.218911  |
| H    | -5.832487 | -1.220811 | 0.343423  |
| H    | -4.272741 | 2.681631  | -0.481244 |
| H    | -6.208485 | 1.186092  | -0.102527 |
| H    | -3.535355 | -2.116564 | 0.411481  |
| H    | -1.989941 | 1.792979  | -0.415110 |

**Table 2** Optimized Cartesian coordinates of unsubstituted Chalcone (*s-cis* conformer) at the CAM-B3LYP/6-311++G\*\* level of theory in hexane with CPCM model (Charge = 0, Multiplicity = 1).

| Atom | x (Å)     | y (Å)     | z (Å)     |
|------|-----------|-----------|-----------|
| C    | 5.194860  | 0.795689  | 0.082159  |
| C    | 4.990772  | -0.554420 | -0.163381 |
| C    | 3.700496  | -1.062187 | -0.209593 |
| C    | 2.593214  | -0.232842 | -0.013774 |
| C    | 2.815467  | 1.126308  | 0.234790  |
| C    | 4.101978  | 1.633829  | 0.281908  |
| C    | 1.256805  | -0.826441 | -0.075768 |
| C    | 0.080993  | -0.202336 | 0.044921  |
| C    | -1.181916 | -0.972348 | -0.023827 |
| O    | -1.181396 | -2.190346 | -0.071068 |
| C    | -2.480822 | -0.227121 | -0.015143 |
| C    | -2.579576 | 1.127121  | -0.333017 |
| C    | -3.815943 | 1.758563  | -0.337043 |
| C    | -4.961462 | 1.046624  | -0.009855 |
| C    | -4.871583 | -0.303845 | 0.309895  |
| C    | -3.640500 | -0.937046 | 0.299346  |
| H    | -3.883560 | 2.808030  | -0.596621 |
| H    | -1.699584 | 1.696101  | -0.602619 |
| H    | -3.553916 | -1.990053 | 0.534350  |
| H    | -5.764410 | -0.861836 | 0.564869  |
| H    | -5.924974 | 1.542279  | -0.006175 |
| H    | 0.024534  | 0.864325  | 0.211936  |
| H    | 1.222540  | -1.900099 | -0.240001 |
| H    | 5.836061  | -1.213793 | -0.318577 |
| H    | 4.257126  | 2.688244  | 0.476343  |
| H    | 6.200531  | 1.196673  | 0.119901  |
| H    | 3.542438  | -2.117569 | -0.400595 |
| H    | 1.977685  | 1.793176  | 0.396022  |

**Table 3** Optimized Cartesian coordinates of unsubstituted Chalcone (*s-cis* conformer) at the CAM-B3LYP/6-311++G\*\* level of theory in acetonitrile with CPCM model (Charge = 0, Multiplicity = 1).

| Atom | x (Å)     | y (Å)     | z (Å)     |
|------|-----------|-----------|-----------|
| C    | 5.185399  | 0.805646  | 0.096317  |
| C    | 4.990001  | -0.545946 | -0.151541 |
| C    | 3.702265  | -1.060186 | -0.206506 |
| C    | 2.589981  | -0.235065 | -0.016396 |
| C    | 2.802757  | 1.125974  | 0.234012  |
| C    | 4.087085  | 1.639228  | 0.289361  |
| C    | 1.257325  | -0.835002 | -0.086703 |
| C    | 0.078097  | -0.216218 | 0.041407  |
| C    | -1.182975 | -0.982178 | -0.036731 |
| O    | -1.187534 | -2.203577 | -0.098280 |
| C    | -2.477500 | -0.233528 | -0.019152 |
| C    | -2.570395 | 1.116168  | -0.360578 |
| C    | -3.802559 | 1.756125  | -0.358581 |
| C    | -4.948572 | 1.059185  | -0.000104 |
| C    | -4.864244 | -0.285787 | 0.345392  |
| C    | -3.637855 | -0.928659 | 0.327476  |
| H    | -3.866056 | 2.800899  | -0.636841 |
| H    | -1.690673 | 1.674124  | -0.652840 |
| H    | -3.560109 | -1.976725 | 0.586410  |
| H    | -5.756829 | -0.831042 | 0.627043  |
| H    | -5.908026 | 1.562377  | 0.009266  |
| H    | 0.018602  | 0.848018  | 0.220786  |
| H    | 1.233346  | -1.906567 | -0.264954 |
| H    | 5.839610  | -1.200756 | -0.302013 |
| H    | 4.236011  | 2.694345  | 0.484311  |
| H    | 6.188802  | 1.211581  | 0.140406  |
| H    | 3.551200  | -2.116179 | -0.399701 |
| H    | 1.961517  | 1.790012  | 0.388315  |

**Table 4** Optimized Cartesian coordinates of unsubstituted Chalcone (*s-trans* conformer) at the CAM-B3LYP/6-311++G\*\* level of theory in gas phase (Charge = 0, Multiplicity = 1).

| Atom | x (Å)     | y (Å)     | z (Å)     |
|------|-----------|-----------|-----------|
| C    | 4.930672  | -0.622925 | -0.092091 |
| C    | 4.018864  | -1.571857 | -0.548078 |
| C    | 2.657506  | -1.285968 | -0.541041 |
| C    | 2.182537  | -0.048265 | -0.084556 |
| C    | 3.111422  | 0.897273  | 0.375444  |
| C    | 4.470461  | 0.610999  | 0.370658  |
| C    | 0.743963  | 0.195047  | -0.104842 |
| C    | 0.124241  | 1.356394  | 0.186818  |
| C    | -1.326328 | 1.575491  | 0.045985  |
| O    | -1.760877 | 2.713755  | -0.108802 |
| C    | -2.258026 | 0.409352  | 0.064401  |
| C    | -2.074308 | -0.680630 | 0.922137  |
| C    | -3.007424 | -1.714473 | 0.945827  |
| C    | -4.114614 | -1.677009 | 0.100773  |
| C    | -4.301058 | -0.590216 | -0.753981 |
| C    | -3.384954 | 0.455298  | -0.762035 |
| H    | -2.871181 | -2.546114 | 1.623318  |
| H    | -1.223203 | -0.702782 | 1.588676  |
| H    | -3.525269 | 1.317104  | -1.399773 |
| H    | -5.162605 | -0.557226 | -1.406464 |
| H    | -4.832366 | -2.485647 | 0.113396  |
| H    | 0.684999  | 2.248627  | 0.434997  |
| H    | 0.131500  | -0.645346 | -0.413080 |
| H    | 4.366610  | -2.530774 | -0.906677 |
| H    | 5.174210  | 1.349233  | 0.729802  |
| H    | 5.989590  | -0.840958 | -0.094199 |
| H    | 1.946960  | -2.022480 | -0.895009 |
| H    | 2.770054  | 1.855259  | 0.742914  |

**Table 5** Optimized Cartesian coordinates of unsubstituted Chalcone (*s-trans* conformer) at the CAM-B3LYP/6-311++G\*\* level of theory in hexane with CPCM model (Charge = 0, Multiplicity = 1).

| Atom | x (Å)     | y (Å)     | z (Å)     |
|------|-----------|-----------|-----------|
| C    | 4.955289  | -0.619329 | -0.086292 |
| C    | 4.047898  | -1.580068 | -0.508544 |
| C    | 2.689757  | -1.296720 | -0.508243 |
| C    | 2.214398  | -0.051893 | -0.088978 |
| C    | 3.141168  | 0.906742  | 0.334153  |
| C    | 4.496177  | 0.624724  | 0.335210  |
| C    | 0.767512  | 0.187513  | -0.109714 |
| C    | 0.137219  | 1.323459  | 0.205464  |
| C    | -1.315378 | 1.547522  | 0.064180  |
| O    | -1.731525 | 2.685137  | -0.072398 |
| C    | -2.276085 | 0.399233  | 0.065618  |
| C    | -2.119964 | -0.703522 | 0.903752  |
| C    | -3.073990 | -1.712337 | 0.915486  |
| C    | -4.178702 | -1.635098 | 0.078604  |
| C    | -4.340183 | -0.536858 | -0.758720 |
| C    | -3.400830 | 0.481246  | -0.754854 |
| H    | -2.954727 | -2.558241 | 1.581622  |
| H    | -1.267315 | -0.763060 | 1.568078  |
| H    | -3.525554 | 1.352020  | -1.386195 |
| H    | -5.203893 | -0.472459 | -1.409404 |
| H    | -4.918036 | -2.427168 | 0.082591  |
| H    | 0.682545  | 2.216601  | 0.489539  |
| H    | 0.173163  | -0.658502 | -0.440237 |
| H    | 4.396439  | -2.551180 | -0.838525 |
| H    | 5.200872  | 1.377993  | 0.666248  |
| H    | 6.016754  | -0.835715 | -0.084414 |
| H    | 1.982788  | -2.049474 | -0.838896 |
| H    | 2.803447  | 1.880409  | 0.666024  |

**Table 6** Optimized Cartesian coordinates of unsubstituted Chalcone (*s-trans* conformer) at the CAM-B3LYP/6-311++G\*\* level of theory in acetonitrile with CPCM model (Charge = 0, Multiplicity = 1)

| Atom | x (Å)     | y (Å)     | z (Å)     |
|------|-----------|-----------|-----------|
| C    | -5.195072 | 0.796111  | -0.085917 |
| C    | -4.993097 | -0.564754 | 0.100156  |
| C    | -3.702235 | -1.072466 | 0.149791  |
| C    | -2.593181 | -0.231541 | 0.014845  |
| C    | -2.811950 | 1.138959  | -0.173685 |
| C    | -4.099916 | 1.645185  | -0.222818 |
| C    | -1.258932 | -0.830579 | 0.076648  |
| C    | -0.079817 | -0.205454 | -0.020990 |
| C    | 1.181370  | -0.973186 | 0.043807  |
| O    | 1.184698  | -2.194316 | 0.103416  |
| C    | 2.480029  | -0.228428 | 0.017684  |
| C    | 2.574899  | 1.137214  | 0.290325  |
| C    | 3.811566  | 1.769400  | 0.281946  |
| C    | 4.961290  | 1.049060  | -0.013040 |
| C    | 4.875269  | -0.311482 | -0.291540 |
| C    | 3.644178  | -0.945484 | -0.269118 |
| H    | 3.875123  | 2.827711  | 0.505760  |
| H    | 1.692783  | 1.717004  | 0.528264  |
| H    | 3.567912  | -2.005132 | -0.477773 |
| H    | 5.770374  | -0.876045 | -0.525027 |
| H    | 5.924476  | 1.545996  | -0.025877 |
| H    | -0.021123 | 0.864234  | -0.164246 |
| H    | -1.241173 | -1.907777 | 0.218522  |
| H    | -5.840178 | -1.232251 | 0.206541  |
| H    | -4.254031 | 2.707983  | -0.368997 |
| H    | -6.201180 | 1.197176  | -0.125284 |
| H    | -3.543608 | -2.135443 | 0.295160  |
| H    | -1.973349 | 1.815744  | -0.282923 |

**Table 7** Vertical excitation energies, dominant orbital contributions, and oscillator strengths of the 10 lowest electronic states of unsubstituted chalcone (*s-cis* conformer) computed at the TD-CAM-B3LYP/6-311++G(d,p) in gas phase.

| State          | Transition orbital<br>(% contribution) | Energy/eV | Oscillator strength |
|----------------|----------------------------------------|-----------|---------------------|
| T <sub>1</sub> | HOMO → LUMO (77)                       | 2.42      | 0.000               |
| T <sub>2</sub> | HOMO-4 → LUMO (34)                     | 3.13      | 0.000               |
|                | HOMO-1 → LUMO (41)                     |           |                     |
| T <sub>3</sub> | HOMO-4 → LUMO (37)                     | 3.33      | 0.000               |
| S <sub>1</sub> | HOMO-4 → LUMO (62)                     | 3.62      | 0.000               |
| T <sub>4</sub> | HOMO-5 → LUMO (25)                     | 3.84      | 0.000               |
|                | HOMO-3 → LUMO+4 (32)                   |           |                     |
| T <sub>5</sub> | HOMO-2 → LUMO (45)                     | 4.24      | 0.000               |
| T <sub>6</sub> | HOMO-3 → LUMO (60)                     | 4.27      | 0.000               |
| S <sub>2</sub> | HOMO → LUMO (93)                       | 4.31      | 0.81                |
| T <sub>7</sub> | HOMO-2 → LUMO+5 (27)                   | 4.45      | 0.000               |
| T <sub>8</sub> | HOMO-3 → LUMO+4 (39)                   | 4.67      | 0.000               |

**Table 8** Vertical excitation energies, dominant orbital contributions, and oscillator strengths of the 10 lowest electronic states of unsubstituted chalcone (*s-cis* conformer) computed at the TD-CAM-B3LYP/6-311++G(d,p) in hexane.

| State          | Transition orbital<br>( % contribution) | Energy/eV | Oscillator strength |
|----------------|-----------------------------------------|-----------|---------------------|
| T <sub>1</sub> | HOMO → LUMO (77)                        | 2.34      | 0.000               |
| T <sub>2</sub> | HOMO-4 → LUMO (39)                      | 3.16      | 0.000               |
|                | HOMO-1 → LUMO (41)                      |           |                     |
| T <sub>3</sub> | HOMO-4 → LUMO (44)                      | 3.32      | 0.000               |
| S <sub>1</sub> | HOMO-4 → LUMO (69)                      | 3.65      | 0.000               |
| T <sub>4</sub> | HOMO-5 → LUMO (25)                      | 3.84      | 0.000               |
|                | HOMO-3 → LUMO+4 (26)                    |           |                     |
| S <sub>2</sub> | HOMO → LUMO (93)                        | 4.15      | 0.92                |
| T <sub>5</sub> | HOMO-2 → LUMO (36)                      | 4.20      | 0.000               |
| T <sub>6</sub> | HOMO-3 → LUMO (50)                      | 4.23      | 0.000               |
| T <sub>7</sub> | HOMO-2 → LUMO+5 (35)                    | 4.45      | 0.000               |
| T <sub>8</sub> | HOMO-3 → LUMO+4 (34)                    | 4.67      | 0.000               |

**Table 9** Vertical excitation energies, dominant orbital contributions, and oscillator strengths of the 10 lowest electronic states of unsubstituted chalcone (*s-cis* conformer) computed at the TD-CAM-B3LYP/6-311++G(d,p) in acetonitrile.

| State          | Transition orbital<br>( % contribution) | Energy/eV | Oscillator strength |
|----------------|-----------------------------------------|-----------|---------------------|
| T <sub>1</sub> | HOMO → LUMO (76)                        | 2.38      | 0.000               |
| T <sub>2</sub> | HOMO-4 → LUMO (20)                      | 3.20      | 0.000               |
|                | HOMO-1 → LUMO (38)                      |           |                     |
| T <sub>3</sub> | HOMO-4 → LUMO (59)                      | 3.36      | 0.000               |
| S <sub>1</sub> | HOMO-4 → LUMO (75)                      | 3.72      | 0.000               |
| T <sub>4</sub> | HOMO-5 → LUMO (25)                      | 3.83      | 0.000               |
|                | HOMO-3 → LUMO+4 (26)                    |           |                     |
| S <sub>2</sub> | HOMO → LUMO (93)                        | 4.09      | 0.92                |
| T <sub>5</sub> | HOMO-3 → LUMO (46)                      | 4.15      | 0.000               |
| T <sub>6</sub> | HOMO-2 → LUMO (65)                      | 4.17      | 0.000               |
| T <sub>7</sub> | HOMO-3 → LUMO+3 (33)                    | 4.45      | 0.000               |
| T <sub>8</sub> | HOMO-2 → LUMO+4 (24)                    | 4.66      | 0.000               |

**Table 10** Tentative assignment of Raman modes of unsubstituted chalcone (*s-cis* conformer) in acetonitrile.

| Experiment (cm <sup>-1</sup> ) | Computed (cm <sup>-1</sup> ) | Tentative Assignments  |
|--------------------------------|------------------------------|------------------------|
| 1665                           | 1664                         | C=O stretch            |
| 1608                           | 1605                         | C=C stretch            |
| 1596                           | 1597                         | C=C stretch            |
| 1575                           | 1574                         | C=C stretch            |
| 1493                           | 1478                         | CCH + CCC bend         |
| 1331                           | 1315                         | C-C stretch + CCH bend |
| 1205                           | 1208                         | C-C stretch + CCH bend |
| 1178                           | 1191                         | C-C stretch            |
| 1158                           | 1162                         | C-C + C-C-H bend       |
| 997                            | 987                          | phenyl ring breathing  |

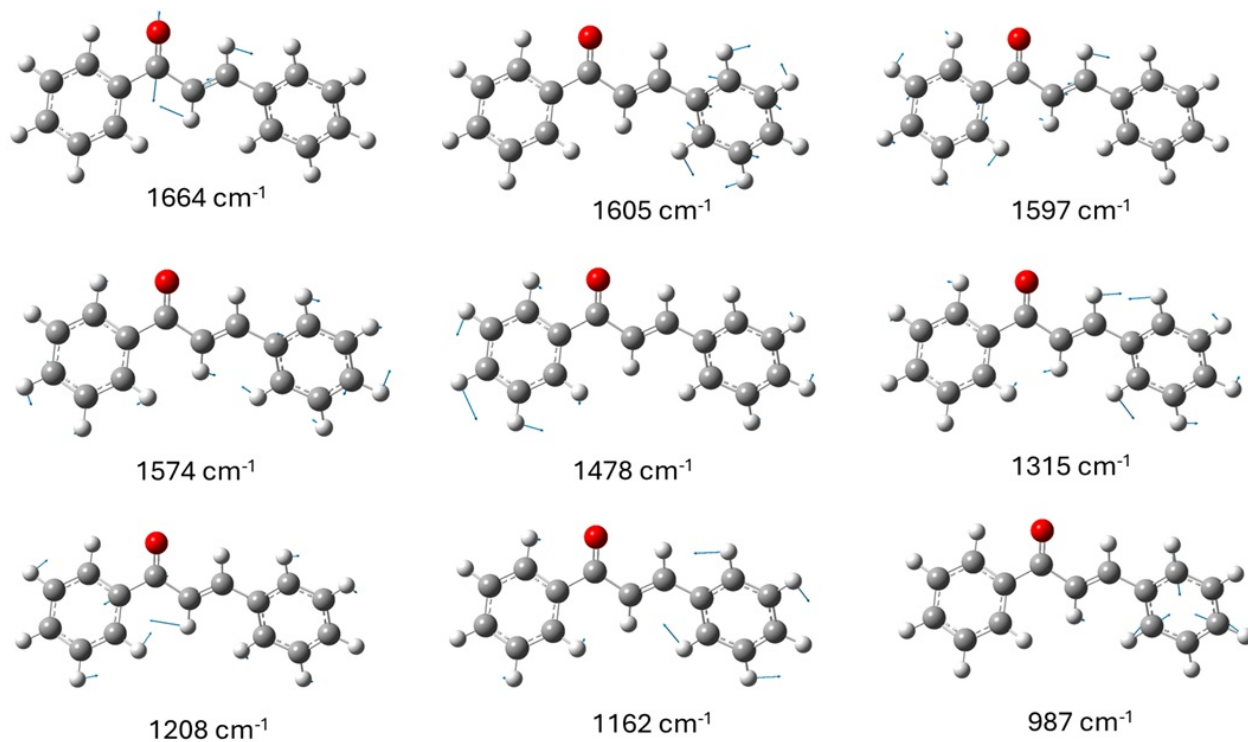

**Figure 2** Vector diagram of the computed Raman mode for unsubstituted chalcone in acetonitrile.

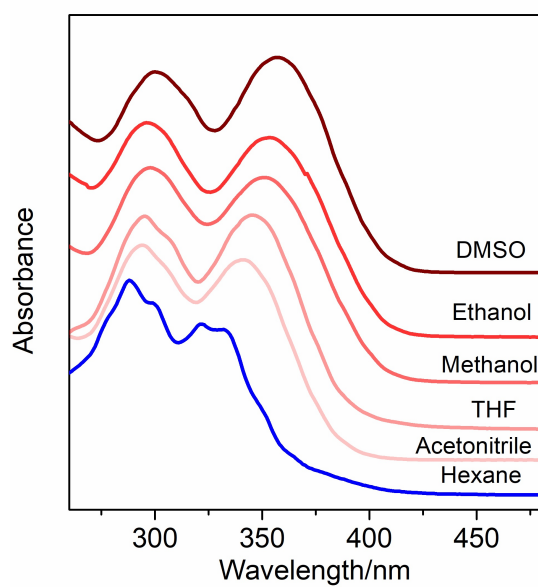

**Figure 3** Solvent-dependent UV-Vis spectra of 2HyC presented as a stacked plot.

**Table 11** Optimized Cartesian coordinates of 2-hydroxychalcone Chalcone (C<sub>-1</sub> conformer) at the CAM-B3LYP/6-311++G\*\* level of theory in gas phase (Charge = 0, Multiplicity = 1).

| Atom | x (Å)     | y (Å)     | z (Å)     |
|------|-----------|-----------|-----------|
| C    | -3.978351 | 1.697433  | 0.298964  |
| C    | -2.739179 | 1.071759  | 0.281641  |
| C    | -2.641898 | -0.292674 | 0.012956  |
| C    | -3.806777 | -1.018547 | -0.238115 |
| C    | -5.041159 | -0.392627 | -0.232611 |
| C    | -5.129297 | 0.968544  | 0.037029  |
| H    | -4.043895 | 2.756408  | 0.518031  |
| H    | -1.853617 | 1.654436  | 0.497836  |
| H    | -3.716613 | -2.079329 | -0.433841 |
| H    | -5.938533 | -0.964630 | -0.436011 |
| H    | -6.095486 | 1.459214  | 0.045188  |
| C    | -1.339409 | -1.036492 | 0.004230  |
| C    | -0.076530 | -0.260414 | -0.038230 |
| H    | -0.114127 | 0.808425  | -0.161346 |
| C    | 1.090359  | -0.908691 | 0.056844  |
| H    | 1.019955  | -1.987655 | 0.170161  |
| C    | 2.454421  | -0.391522 | 0.029344  |
| C    | 3.501400  | -1.313750 | 0.150202  |
| C    | 2.806565  | 0.961225  | -0.109619 |
| C    | 4.831467  | -0.934706 | 0.135145  |
| C    | 4.140319  | 1.349612  | -0.125173 |
| C    | 5.150013  | 0.408944  | -0.003854 |
| H    | 5.612063  | -1.678301 | 0.230740  |
| H    | 4.385529  | 2.401664  | -0.233573 |
| H    | 6.184485  | 0.729802  | -0.018376 |
| O    | -1.340028 | -2.253555 | 0.020305  |
| H    | 3.243990  | -2.361125 | 0.258160  |
| O    | 1.813601  | 1.884912  | -0.228073 |
| H    | 2.195995  | 2.761674  | -0.327343 |

**Table 12** Optimized Cartesian coordinates of 2-hydroxychalcone Chalcone (C<sub>-1</sub> conformer) at the CAM-B3LYP/6-311++G\*\* level of theory in hexane with CPCM model (Charge = 0, Multiplicity = 1).

| Atom | x (Å)     | y (Å)     | z (Å)     |
|------|-----------|-----------|-----------|
| C    | -3.971003 | 1.691348  | 0.338236  |
| C    | -2.734380 | 1.060277  | 0.322114  |
| C    | -2.639634 | -0.297147 | 0.016703  |
| C    | -3.804064 | -1.009704 | -0.273877 |
| C    | -5.035704 | -0.377512 | -0.271087 |
| C    | -5.121419 | 0.976052  | 0.036712  |
| H    | -4.034836 | 2.743746  | 0.586940  |
| H    | -1.849993 | 1.632331  | 0.569087  |
| H    | -3.720062 | -2.064696 | -0.500710 |
| H    | -5.932108 | -0.938444 | -0.506561 |
| H    | -6.085160 | 1.471352  | 0.043241  |
| C    | -1.339525 | -1.042747 | 0.011314  |
| C    | -0.078608 | -0.268134 | -0.035995 |
| H    | -0.120537 | 0.799638  | -0.167107 |
| C    | 1.091815  | -0.911825 | 0.064336  |
| H    | 1.028377  | -1.989898 | 0.188147  |
| C    | 2.453751  | -0.391251 | 0.031916  |
| C    | 3.502857  | -1.310845 | 0.164321  |
| C    | 2.801056  | 0.961811  | -0.122877 |
| C    | 4.831512  | -0.927575 | 0.146070  |
| C    | 4.134282  | 1.353994  | -0.141880 |
| C    | 5.145503  | 0.416512  | -0.008453 |
| H    | 5.614614  | -1.667278 | 0.250895  |
| H    | 4.376214  | 2.404850  | -0.263140 |
| H    | 6.179090  | 0.740118  | -0.025845 |
| O    | -1.342997 | -2.262341 | 0.032325  |
| H    | 3.248696  | -2.357737 | 0.284129  |
| O    | 1.805116  | 1.878312  | -0.253150 |
| H    | 2.180123  | 2.758734  | -0.357807 |

**Table 13** Optimized Cartesian coordinates of 2-hydroxychalcone Chalcone (C<sub>-1</sub> conformer) at the CAM-B3LYP/6-311++G\*\* level of theory in acetonitrile with CPCM model (Charge = 0, Multiplicity = 1).

| Atom | x (Å)     | y (Å)     | z (Å)     |
|------|-----------|-----------|-----------|
| C    | -3.960335 | 1.681218  | 0.392500  |
| C    | -2.727616 | 1.042300  | 0.377890  |
| C    | -2.635859 | -0.303814 | 0.022275  |
| C    | -3.798775 | -0.995812 | -0.322116 |
| C    | -5.026076 | -0.354280 | -0.322785 |
| C    | -5.108975 | 0.986961  | 0.037226  |
| H    | -4.022230 | 2.723231  | 0.681366  |
| H    | -1.845311 | 1.597889  | 0.666467  |
| H    | -3.722050 | -2.041054 | -0.592404 |
| H    | -5.920487 | -0.897712 | -0.602253 |
| H    | -6.068972 | 1.489188  | 0.041363  |
| C    | -1.339387 | -1.051787 | 0.020289  |
| C    | -0.081720 | -0.279687 | -0.034044 |
| H    | -0.129062 | 0.786869  | -0.173981 |
| C    | 1.094068  | -0.916832 | 0.072343  |
| H    | 1.039871  | -1.993738 | 0.209183  |
| C    | 2.452273  | -0.391243 | 0.034098  |
| C    | 3.505172  | -1.306195 | 0.182802  |
| C    | 2.792030  | 0.962404  | -0.141357 |
| C    | 4.831238  | -0.916147 | 0.161859  |
| C    | 4.124284  | 1.360549  | -0.163517 |
| C    | 5.137974  | 0.428690  | -0.012927 |
| H    | 5.618498  | -1.649405 | 0.279791  |
| H    | 4.361213  | 2.409935  | -0.301175 |
| H    | 6.170017  | 0.756942  | -0.032819 |
| O    | -1.347175 | -2.275374 | 0.047888  |
| H    | 3.256003  | -2.352456 | 0.318107  |
| O    | 1.791744  | 1.867743  | -0.288191 |
| H    | 2.156171  | 2.753401  | -0.398428 |

**Table 14** Optimized Cartesian coordinates of 2-hydroxychalcone Chalcone (C<sub>2</sub> conformer) at the CAM-B3LYP/6-311++G\*\* level of theory in gas phase (Charge = 0, Multiplicity = 1).

| Atom | x (Å)     | y (Å)     | z (Å)     |
|------|-----------|-----------|-----------|
| C    | -4.106454 | 1.651526  | 0.641618  |
| C    | -2.848419 | 1.081281  | 0.502782  |
| C    | -2.709302 | -0.198749 | -0.031152 |
| C    | -3.851154 | -0.898379 | -0.421920 |
| C    | -5.104539 | -0.324601 | -0.296586 |
| C    | -5.234551 | 0.952811  | 0.236707  |
| H    | -4.204810 | 2.642467  | 1.068187  |
| H    | -1.980832 | 1.635234  | 0.836896  |
| H    | -3.728870 | -1.897093 | -0.821139 |
| H    | -5.984232 | -0.873156 | -0.611188 |
| H    | -6.215667 | 1.401272  | 0.339190  |
| C    | -1.383652 | -0.884001 | -0.180183 |
| C    | -0.150087 | -0.064139 | -0.141412 |
| H    | -0.247002 | 1.013290  | -0.141778 |
| C    | 1.049332  | -0.653417 | -0.112037 |
| H    | 1.066878  | -1.737241 | -0.077601 |
| C    | 2.346285  | 0.021343  | -0.109174 |
| C    | 2.508544  | 1.358702  | -0.480711 |
| C    | 3.493757  | -0.694168 | 0.262957  |
| C    | 3.747770  | 1.973063  | -0.474662 |
| C    | 4.742802  | -0.084010 | 0.271690  |
| C    | 4.869031  | 1.245297  | -0.094598 |
| H    | 3.843366  | 3.009024  | -0.773534 |
| H    | 5.616209  | -0.655666 | 0.568821  |
| H    | 5.846804  | 1.711438  | -0.087285 |
| O    | -1.340262 | -2.088343 | -0.343164 |
| H    | 1.640064  | 1.920552  | -0.801436 |
| O    | 3.333514  | -1.995629 | 0.623320  |
| H    | 4.185910  | -2.393701 | 0.819709  |

**Table 15** Optimized Cartesian coordinates of 2-hydroxychalcone Chalcone (C<sub>2</sub> conformer) at the CAM-B3LYP/6-311++G\*\* level of theory in hexane with CPCM model (Charge = 0, Multiplicity = 1).

| Atom | x (Å)     | y (Å)     | z (Å)     |
|------|-----------|-----------|-----------|
| C    | -4.116123 | 1.659922  | 0.591896  |
| C    | -2.856178 | 1.087118  | 0.482438  |
| C    | -2.710658 | -0.205048 | -0.021211 |
| C    | -3.847593 | -0.912703 | -0.413590 |
| C    | -5.102694 | -0.336012 | -0.318476 |
| C    | -5.239240 | 0.952651  | 0.186257  |
| H    | -4.219719 | 2.659875  | 0.995355  |
| H    | -1.993380 | 1.649010  | 0.815339  |
| H    | -3.724213 | -1.918926 | -0.792919 |
| H    | -5.977912 | -0.890523 | -0.634856 |
| H    | -6.221418 | 1.403388  | 0.265339  |
| C    | -1.382520 | -0.889487 | -0.134094 |
| C    | -0.155460 | -0.063237 | -0.121299 |
| H    | -0.261640 | 1.012268  | -0.158356 |
| C    | 1.048666  | -0.644194 | -0.073752 |
| H    | 1.071600  | -1.726408 | -0.011620 |
| C    | 2.344456  | 0.030383  | -0.087626 |
| C    | 2.496125  | 1.382673  | -0.411052 |
| C    | 3.502370  | -0.699528 | 0.222244  |
| C    | 3.735829  | 1.994947  | -0.421858 |
| C    | 4.752833  | -0.090688 | 0.212907  |
| C    | 4.868238  | 1.251430  | -0.106417 |
| H    | 3.823498  | 3.042258  | -0.680955 |
| H    | 5.633778  | -0.674161 | 0.458926  |
| H    | 5.846466  | 1.716664  | -0.112869 |
| O    | -1.334171 | -2.102170 | -0.248164 |
| H    | 1.619225  | 1.960200  | -0.675663 |
| O    | 3.354493  | -2.013544 | 0.537688  |
| H    | 4.212835  | -2.417303 | 0.697894  |

**Table 16** Optimized Cartesian coordinates of 2-hydroxychalcone Chalcone (C<sub>2</sub> conformer) at the CAM-B3LYP/6-311++G\*\* level of theory in acetonitrile with CPCM model (Charge = 0, Multiplicity = 1).

| Atom | x (Å)     | y (Å)     | z (Å)     |
|------|-----------|-----------|-----------|
| C    | -4.131952 | 1.677342  | 0.490247  |
| C    | -2.868924 | 1.103314  | 0.434212  |
| C    | -2.711896 | -0.212022 | -0.003976 |
| C    | -3.839988 | -0.939612 | -0.388080 |
| C    | -5.097757 | -0.361448 | -0.347622 |
| C    | -5.245886 | 0.949323  | 0.094292  |
| H    | -4.244748 | 2.695013  | 0.843358  |
| H    | -2.014429 | 1.683480  | 0.756595  |
| H    | -3.712458 | -1.961237 | -0.722072 |
| H    | -5.965183 | -0.930863 | -0.658638 |
| H    | -6.229801 | 1.401453  | 0.130780  |
| C    | -1.380348 | -0.892755 | -0.052384 |
| C    | -0.162346 | -0.060132 | -0.086649 |
| H    | -0.280233 | 1.009207  | -0.191095 |
| C    | 1.048017  | -0.628330 | -0.005244 |
| H    | 1.077137  | -1.706039 | 0.107357  |
| C    | 2.342365  | 0.043526  | -0.048034 |
| C    | 2.482613  | 1.416754  | -0.284483 |
| C    | 3.512062  | -0.708893 | 0.148575  |
| C    | 3.723148  | 2.024325  | -0.323500 |
| C    | 4.764319  | -0.103279 | 0.109725  |
| C    | 4.867874  | 1.256848  | -0.124477 |
| H    | 3.802756  | 3.087579  | -0.509890 |
| H    | 5.653542  | -0.704386 | 0.264744  |
| H    | 5.846824  | 1.719624  | -0.153355 |
| O    | -1.325075 | -2.114823 | -0.078196 |
| H    | 1.596716  | 2.017548  | -0.446858 |
| O    | 3.377565  | -2.041369 | 0.379857  |
| H    | 4.242146  | -2.451616 | 0.490175  |

**Table 17** Optimized Cartesian coordinates of 2-hydroxychalcone Chalcone (C<sub>1</sub> conformer) at the CAM-B3LYP/aug-cc-pvdz level of theory in acetonitrile with CPCM model (Charge = 0, Multiplicity = 1).

| Atom | x (Å)     | y (Å)     | z (Å)     |
|------|-----------|-----------|-----------|
| C    | -3.980129 | 1.731761  | 0.000037  |
| C    | -2.736497 | 1.104398  | -0.000012 |
| C    | -2.646636 | -0.292692 | -0.000050 |
| C    | -3.828066 | -1.046256 | -0.000035 |
| C    | -5.068264 | -0.421596 | 0.000015  |
| C    | -5.146925 | 0.971936  | 0.000051  |
| H    | -4.036342 | 2.819335  | 0.000065  |
| H    | -1.842873 | 1.722315  | -0.000022 |
| H    | -3.753942 | -2.131364 | -0.000063 |
| H    | -5.978819 | -1.019688 | 0.000025  |
| H    | -6.119073 | 1.464232  | 0.000090  |
| C    | -1.340703 | -1.031385 | -0.000106 |
| C    | -0.077086 | -0.262786 | -0.000057 |
| H    | -0.111561 | 0.817945  | -0.000032 |
| C    | 1.099322  | -0.918076 | -0.000045 |
| H    | 1.038776  | -2.008432 | -0.000071 |
| C    | 2.462943  | -0.397249 | -0.000004 |
| C    | 2.811873  | 0.969305  | 0.000036  |
| C    | 3.514681  | -1.331434 | -0.000003 |
| C    | 4.150058  | 1.362453  | 0.000073  |
| C    | 4.847427  | -0.948154 | 0.000034  |
| H    | 3.259497  | -2.391031 | -0.000033 |
| C    | 5.162493  | 0.410686  | 0.000072  |
| H    | 4.393024  | 2.425407  | 0.000103  |
| H    | 5.635521  | -1.698897 | 0.000033  |
| H    | 6.202575  | 0.734894  | 0.000101  |
| O    | -1.343496 | -2.260362 | -0.000072 |
| O    | 1.815213  | 1.894855  | 0.000036  |
| H    | 2.192525  | 2.783873  | 0.000066  |

**Table 18** Optimized Cartesian coordinates of 2-hydroxychalcone Chalcone (C<sub>2</sub> conformer) at the CAM-B3LYP/aug-cc-pvdz level of theory in acetonitrile with CPCM model (Charge = 0, Multiplicity = 1).

| Atom | x (Å)     | y (Å)     | z (Å)     |
|------|-----------|-----------|-----------|
| C    | -4.166171 | 1.749790  | -0.000121 |
| C    | -2.889835 | 1.191975  | -0.000242 |
| C    | -2.722930 | -0.198068 | -0.000070 |
| C    | -3.861124 | -1.015602 | 0.000260  |
| C    | -5.133817 | -0.460264 | 0.000419  |
| C    | -5.289219 | 0.926775  | 0.000221  |
| H    | -4.282205 | 2.832595  | -0.000278 |
| H    | -2.032965 | 1.859796  | -0.000462 |
| H    | -3.727153 | -2.094968 | 0.000442  |
| H    | -6.010009 | -1.107629 | 0.000707  |
| H    | -6.287004 | 1.364725  | 0.000325  |
| C    | -1.379606 | -0.866056 | -0.000227 |
| C    | -0.155909 | -0.037147 | -0.000217 |
| H    | -0.258076 | 1.043387  | -0.000158 |
| C    | 1.055432  | -0.621126 | -0.000216 |
| H    | 1.075971  | -1.709995 | -0.000209 |
| C    | 2.355958  | 0.045903  | -0.000102 |
| C    | 2.499385  | 1.443280  | -0.000087 |
| C    | 3.529631  | -0.731979 | 0.000048  |
| C    | 3.746264  | 2.048519  | 0.000063  |
| C    | 4.789308  | -0.130456 | 0.000210  |
| C    | 4.895433  | 1.253812  | 0.000216  |
| H    | 3.828491  | 3.133796  | 0.000068  |
| H    | 5.683515  | -0.754541 | 0.000341  |
| H    | 5.881921  | 1.716158  | 0.000346  |
| O    | -1.316291 | -2.093148 | -0.000340 |
| H    | 1.608720  | 2.068682  | -0.000195 |
| O    | 3.393673  | -2.087072 | 0.000062  |
| H    | 4.262943  | -2.506377 | 0.000373  |

**Table 19** Optimized Cartesian coordinates of 2-hydroxychalcone Chalcone (C\_3 conformer) at the CAM-B3LYP/6-311++G\*\* level of theory in acetonitrile with CPCM model (Charge = 0, Multiplicity = 1).

| Atom | x (Å)     | y (Å)     | z (Å)     |
|------|-----------|-----------|-----------|
| C    | -4.071451 | 1.611605  | 0.772021  |
| C    | -2.820852 | 1.037231  | 0.588912  |
| C    | -2.700425 | -0.198536 | -0.047887 |
| C    | -3.851834 | -0.845752 | -0.501122 |
| C    | -5.097376 | -0.265000 | -0.332231 |
| C    | -5.209064 | 0.965350  | 0.307556  |
| H    | -4.156007 | 2.565571  | 1.277718  |
| H    | -1.947359 | 1.552158  | 0.966389  |
| H    | -3.752156 | -1.805900 | -0.990620 |
| H    | -5.983641 | -0.769778 | -0.696932 |
| H    | -6.183471 | 1.418903  | 0.444090  |
| C    | -1.384361 | -0.879075 | -0.240936 |
| C    | -0.148505 | -0.071569 | -0.156133 |
| H    | -0.236761 | 1.004439  | -0.101156 |
| C    | 1.049154  | -0.667485 | -0.149237 |
| H    | 1.031748  | -1.754482 | -0.186809 |
| C    | 2.350544  | -0.004545 | -0.120626 |
| C    | 2.512070  | 1.312855  | -0.573802 |
| C    | 3.491485  | -0.683843 | 0.336155  |
| C    | 3.746021  | 1.932035  | -0.581575 |
| C    | 4.738077  | -0.065164 | 0.324829  |
| C    | 4.864633  | 1.233635  | -0.130782 |
| H    | 3.843154  | 2.946419  | -0.946627 |
| H    | 5.594552  | -0.620111 | 0.686635  |
| H    | 5.839767  | 1.705390  | -0.135554 |
| O    | -1.344224 | -2.078752 | -0.473671 |
| H    | 1.647653  | 1.844107  | -0.952326 |
| O    | 3.460983  | -1.956371 | 0.816370  |
| H    | 2.559751  | -2.276179 | 0.922741  |

**Table 20** Vertical excitation energies, dominant orbital contributions, and oscillator strengths of the 10 lowest electronic states of C\_1 conformer) computed at the TD-CAM-B3LYP/6-311++G(d,p) in acetonitrile.

| State          | Transition orbital<br>( % contribution) | Energy/eV | Oscillator strength |
|----------------|-----------------------------------------|-----------|---------------------|
| T <sub>1</sub> | HOMO → LUMO (64)                        | 2.4       | 0.000               |
| T <sub>2</sub> | HOMO-2 → LUMO (41)                      | 3.21      | 0.000               |
| T <sub>3</sub> | HOMO-4 → LUMO (61)                      | 3.36      | 0.000               |
| S <sub>1</sub> | HOMO-4 → LUMO (74)                      | 3.73      | 0.004               |
| T <sub>4</sub> | HOMO-1 → LUMO (53)                      | 3.78      | 0.000               |
| T <sub>5</sub> | HOMO-5 → LUMO (14)                      | 3.84      | 0.000               |
| S <sub>2</sub> | HOMO → LUMO (92)                        | 3.95      | 0.76                |
| T <sub>6</sub> | HOMO-3 → LUMO (48)                      | 4.17      | 0.000               |
| T <sub>7</sub> | HOMO-3 → LUMO+2 (21)                    | 4.42      | 0.000               |
| T <sub>8</sub> | HOMO-3 → LUMO+2 (20)                    | 4.52      | 0.000               |

**Table 21** Vertical excitation energies, dominant orbital contributions, and oscillator strengths of the 10 lowest electronic states of C<sub>2</sub> conformer) computed at the TD-CAM-B3LYP/6-311++G(d,p) in acetonitrile.

| State          | Transition orbital<br>(% contribution) | Energy/eV | Oscillator strength |
|----------------|----------------------------------------|-----------|---------------------|
| T <sub>1</sub> | HOMO → LUMO (64)                       | 2.4       | 0.000               |
| T <sub>2</sub> | HOMO-2 → LUMO (41)                     | 3.21      | 0.000               |
| T <sub>3</sub> | HOMO-4 → LUMO (61)                     | 3.36      | 0.000               |
| S <sub>1</sub> | HOMO-4 → LUMO (74)                     | 3.73      | 0.004               |
| T <sub>4</sub> | HOMO-1 → LUMO (53)                     | 3.78      | 0.000               |
| T <sub>5</sub> | HOMO-5 → LUMO (14)                     | 3.84      | 0.000               |
| S <sub>2</sub> | HOMO → LUMO (92)                       | 3.95      | 0.76                |
| T <sub>6</sub> | HOMO-3 → LUMO (48)                     | 4.17      | 0.000               |
| T <sub>7</sub> | HOMO-3 → LUMO+2 (21)                   | 4.42      | 0.000               |
| T <sub>8</sub> | HOMO-3 → LUMO+2 (20)                   | 4.52      | 0.000               |

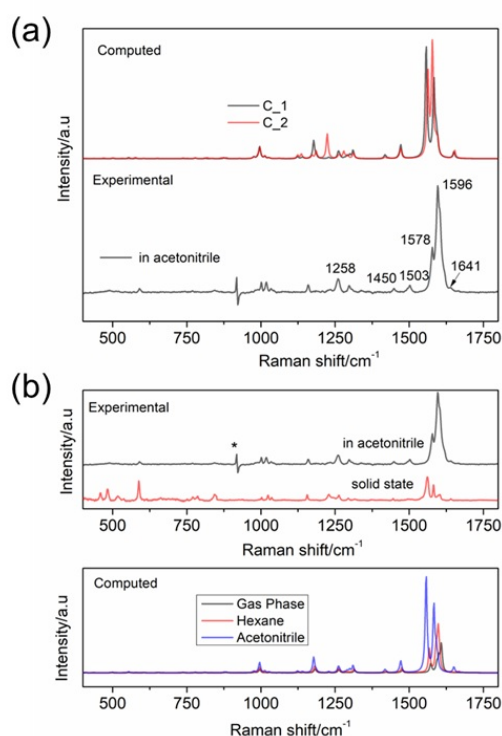

**Figure 4** (a) Experimental and computed Raman spectra (CAM-B3LYP/6-311++G\*\* level of theory in acetonitrile using the CPCM solvation model) of two conformers of 2HyC, together with comparison to the experimental Raman spectrum of 2HyC in acetonitrile. (b) Comparison between the solid-state and solution-phase Raman spectra of 2HyC; the computed Raman spectra in different solvents are shown below.

**Table 22** Tentative assignment of Raman modes of 2HyC (C<sub>1</sub> conformer) in acetonitrile.

| Experiment (cm <sup>-1</sup> ) | Computed (cm <sup>-1</sup> ) | Tentative Assignments  |
|--------------------------------|------------------------------|------------------------|
| 1641                           | 1650                         | C=O stretch            |
| 1596                           | 1583                         | C=C stretch            |
| 1578                           | 1558                         | C=C stretch            |
| 1503                           | 1471                         | C=C stretch            |
| 1450                           | 1418                         | ring vibration         |
| 1258                           | 1260                         | C-C stretch + CCH bend |
| 1023                           | 995                          | ring breathing         |

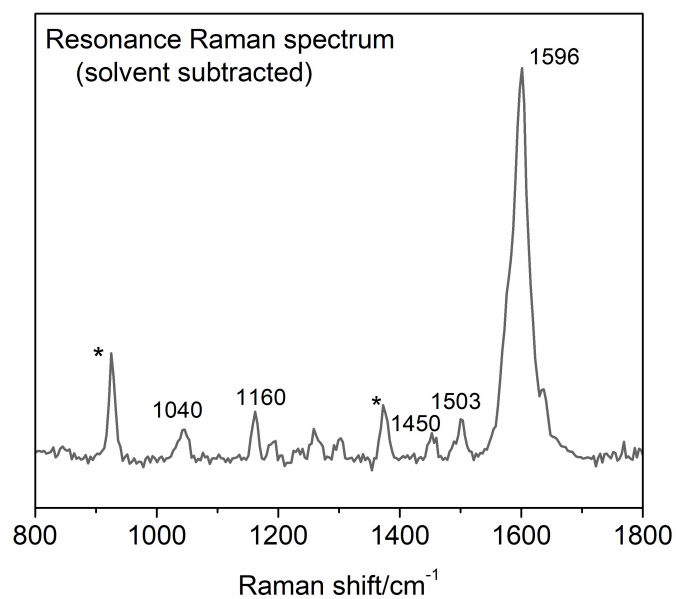

**Figure 5** Solvent-subtracted resonance Raman spectrum of 2HyC in acetonitrile collected with 325 nm excitation. Peaks marked with an asterisk (\*) indicate artefacts arising from solvent subtraction.

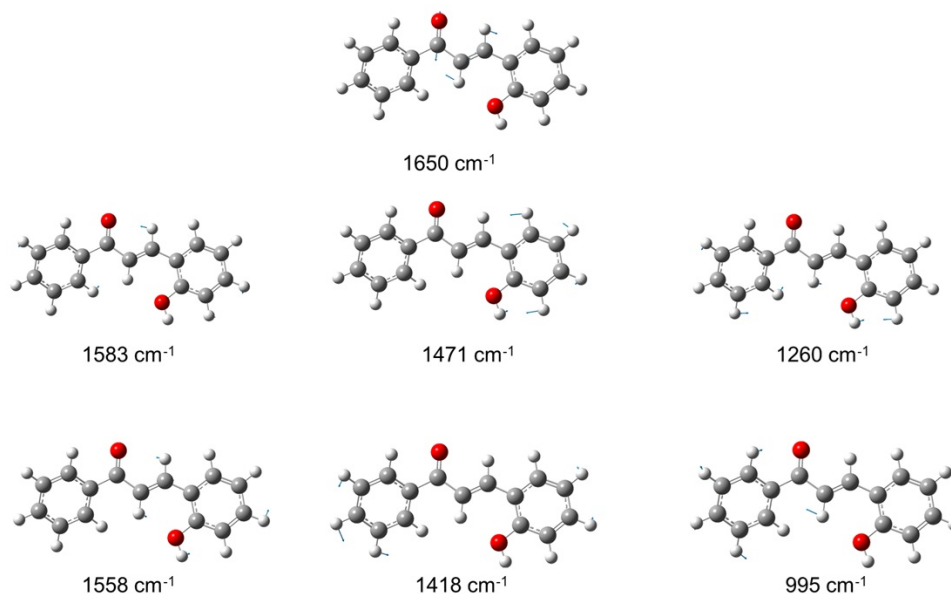

**Figure 6** Vector diagrams of the computed Raman vibrational modes of the C<sub>1</sub> conformer of 2HyC (CAM-B3LYP/6-311++G\*\* level of theory in acetonitrile using the CPCM solvation model).
